## CORRECTION

# Correction: Retraction: Application of sewage sludge combined with thiourea improves the growth and yield attributes of wheat (*Triticum aestivum* L.) genotypes under arsenic-contaminated soil

The *PLOS ONE* Editors

There is an error in paragraph 2, sentence 1, of this Notice of Retraction [1]. The correct sentence is: NM, SK, SY, KtK, SAAlrumman, and EME did not agree with the retraction.

The publisher apologizes for the error.

## Reference

1. The *PLOS ONE* Editors (2022) Retraction: Application of sewage sludge combined with thiourea improves the growth and yield attributes of wheat (*Triticum aestivum* L.) genotypes under arsenic-contaminated soil. *PLoS ONE* 17(9): e0274852. <https://doi.org/10.1371/journal.pone.0274852>

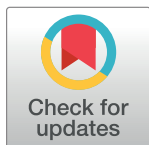

## OPEN ACCESS

**Citation:** The *PLOS ONE* Editors (2022) Correction: Retraction: Application of sewage sludge combined with thiourea improves the growth and yield attributes of wheat (*Triticum aestivum* L.) genotypes under arsenic-contaminated soil. *PLoS ONE* 17(12): e0279581. <https://doi.org/10.1371/journal.pone.0279581>

**Published:** December 19, 2022

**Copyright:** © 2022 The *PLOS ONE* Editors. This is an open access article distributed under the terms of the [Creative Commons Attribution License](https://creativecommons.org/licenses/by/4.0/), which permits unrestricted use, distribution, and reproduction in any medium, provided the original author and source are credited.
